# Supplementary material
Source: HighWire-hosted journal article supplement (https://www.annfammed.org/highwire/filestream/7674/field_highwire_adjunct_files/2/Glasgow_Table_2.pdf)
Supplement: Glasgow_Table_2.pdf [file Glasgow_Table_2.pdf]

**Online Supplementary Material**

Glasgow RE, Ory MG, Klesges LM, Cifuentes M, Fernald DH, Green LA. Practical and relevant self-report measures of health behavior for primary care settings. *Ann Fam Med.* 2005;3:73-81.

<http://www.annfammed.org/cgi/content/full/3/1/73/DC1>

**Table 2. Recommended Items/Measures for Adolescent and Child Behavior Change**

(Source and scoring instructions listed by each item or category)

**ADOLESCENTS (ages 12-17 y)**

**Physical Activity**

Scoring – for PACE+,<sup>37</sup> average the 2 items. If average < 5, not meeting guidelines. YRBSS<sup>38</sup> item scored separately as number of hours.

- Over the past 7 days, on how many days were you physically active for at least 60 minutes per day? (PACE+)
- Over a typical or usual week, on how many days were you physically active for a total of at least 60 minutes per day? (PACE+)
- On an average school day, how many hours do you watch TV? (YRBSS 2003)

**Risky drinking (BRFSS 2003<sup>27</sup>)**

Scoring – any alcohol use not recommended

- During the past 30 days, how many days per week or per month did you have at least one drink of any alcoholic beverage? [if none, STOP]
- On the days when you drank, about how many drinks did you drink on average?
- Considering all types of alcoholic beverages, how many times during the past 30 days did you have 5 or more drinks on an occasion?

**Cigarette Smoking (Smoking Uptake Continuum<sup>39</sup>)**

Scoring – regular smoking = smoking on 30 days; experimental smoking = Yes to first question and <30 days

- Have you ever tried or experimented with cigarette smoking, even a few puffs?
- Think about the last 30 days. On how many of these days did you smoke?

**Eating Patterns (Physical Activity and Nutrition Behaviors Monitoring Form<sup>40</sup>)**

Scoring – Contact Alice Ammerman at [Alice\\_Ammerman@unc.edu](mailto:Alice_Ammerman@unc.edu)

- On a typical day, how many times does your child (do you) drink sweetened beverages such as sweet tea, punch, Kool Aid, sports drinks or fruit drinks? Do not count 100% fruit juices.  
 1 time  2 times  3 or more times  None  Don't know/not sure
- On a typical day, how many times does your child (do you) drink soda? Do not count "diet" soda.  
 1 time  2 times  3 or more times  None  Don't know/not sure
- How many times a week does your child (do you) eat food from a fast food restaurant like Burger King, Chick-Fil-A, Bojangles, or Pizza Hut?  
 Less than once a week  Once a week  2 times a week  3 to 5 times a week  
 More than 5 times a week  Don't know/not sure
- On a typical day, how many times does your child (do you) eat French fries or chips? Chips are potato chips, tortilla chips, Cheetos, corn chips or other snack chips.  
 1 time  2 times  3 or more times  None  Don't know/not sure
- On a typical day, how many glasses of milk does your child (do you) drink? (A glass is the amount in a small carton at school or an 8 ounce drinking glass.)  
 <1 glass  1 glass  2 glasses  3 glasses  4 or more  None  
 Don't know/not sure

- What type of milk does your child (do you) usually drink?  
 *Skim or Non-fat*  *Low fat (1/2- 1%)*  *Reduced fat (2%)*  *Whole*  
 *Flavored low-fat or skim*  *Flavored 2% or whole*  *Don't know/not sure*
- On a typical day, how many servings of vegetables does your child (do you) eat? Do not include French fries.  
 *1 serving*  *2 servings*  *3 or more servings*  *None*  *Don't know/not sure*
- On a typical day, how many servings of fruit does your child (do you) eat?  
 *1 serving*  *2 servings*  *3 or more servings*  *None*  *Don't know/not sure*

**CHILDREN**

**Physical Activity**

No recommendation at this time.

**Risky drinking**

No recommendation at this time.

**Cigarette Smoking (Jackson's Smoking Susceptibility<sup>41</sup>)**

Scoring – Add responses to all 4 items; definitely not = 0; all others = 1.

- Do you think you will be smoking cigarettes 1 year from now?  
*(Definitely not, Probably not, Probably yes, Definitely yes)*
- Do you think you will be smoking cigarettes in high school? *(similar responses)*
- Do you think that most kids who are like you start smoking cigarettes? *(similar responses)*
- Have you ever almost tried smoking a cigarette but then decided not to? *(Yes, No)*

**Eating Patterns (Physical Activity and Nutrition Behaviors Monitoring Form<sup>40</sup>)**

Scoring – Contact Alice Ammerman at [Alice\\_Ammerman@unc.edu](mailto:Alice_Ammerman@unc.edu)

- On a typical day, how many times does your child (do you) drink sweetened beverages such as sweet tea, punch, Kool Aid, sports drinks or fruit drinks? Do not count 100% fruit juices.  
 *1 time*  *2 times*  *3 or more times*  *none*  *Don't know/not sure*
- On a typical day, how many times does your child (do you) drink soda? Do not count “diet” soda.  
 *1 time*  *2 times*  *3 or more times*  *none*  *Don't know/not sure*
- How many times a week does your child (do you) eat food from a fast food restaurant like Burger King, Chick-Fil-A, Bojangles, or Pizza Hut?  
 *Less than once a week*  *Once a week*  *2 times a week*  *3 to 5 times a week*  
 *More than 5 times a week*  *Don't know/not sure*
- On a typical day, how many times does your child (do you) eat French fries or chips? Chips are potato chips, tortilla chips, Cheetos, corn chips or other snack chips.  
 *1 time*  *2 times*  *3 or more times*  *none*  *Don't know/not sure*
- On a typical day, how many glasses of milk does your child (do you) drink? (A glass is the amount in a small carton at school or an 8 ounce drinking glass.)  
 *<1 glass*  *1 glass*  *2 glasses*  *3 glasses*  *4 or more*  *None*  
 *Don't know/not sure*
- What type of milk does your child (do you) usually drink?  
 *Skim or Non-fat*  *Low fat (1/2% - 1%)*  *Reduced fat (2%)*  *Whole*  
 *Flavored low-fat or skim*  *Flavored 2% or Whole*  *Don't know/not sure*
- On a typical day, how many servings of vegetables does your child (do you) eat? Do not include French fries.  
 *1 serving*  *2 servings*  *3 or more servings*  *None*  *Don't know/not sure*
- On a typical day, how many servings of fruit does your child (do you) eat?  
 *1 serving*  *2 servings*  *3 or more servings*  *None*  *Don't know/not sure*

PACE + = Patient-Centered Assessment and Counseling for Exercise Plus Nutrition; YRBSS = Youth Risk Behavior Surveillance System; BRFSS = Behavioral Risk Factor Surveillance System.
